# Supplementary material for: The MOSAiC ice floe: sediment-laden survivor from the Siberian shelf
Source: Copernicus journal article supplement (doi:10.5194/tc-14-2173-2020), 2020-07-05
Supplement: Supplementary file [file tc-14-2173-2020-supplement.pdf]

Supplement of The Cryosphere, 14, 2173–2187, 2020  
<https://doi.org/10.5194/tc-14-2173-2020-supplement>  
© Author(s) 2020. This work is distributed under  
the Creative Commons Attribution 4.0 License.

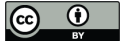

*Supplement of*

## **The MOSAiC ice floe: sediment-laden survivor from the Siberian shelf**

**Thomas Krumpen et al.**

*Correspondence to:* Thomas Krumpen (tkruppen@awi.de)

The copyright of individual parts of the supplement might differ from the CC BY 4.0 License.

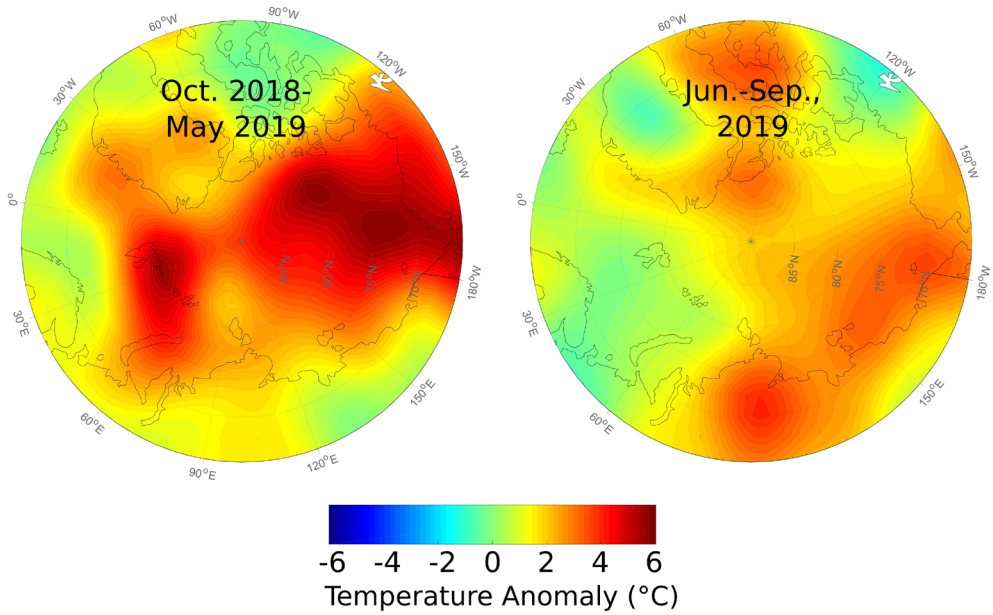

5 **Figure S1:** left) October 2018 – May 2019 and right) June – September 2019 1000 hPa air temperature anomalies in °C in comparison to the 1981 - 2010 climatology (data source: [www.esrl.noaa.gov/psd/products](http://www.esrl.noaa.gov/psd/products)).

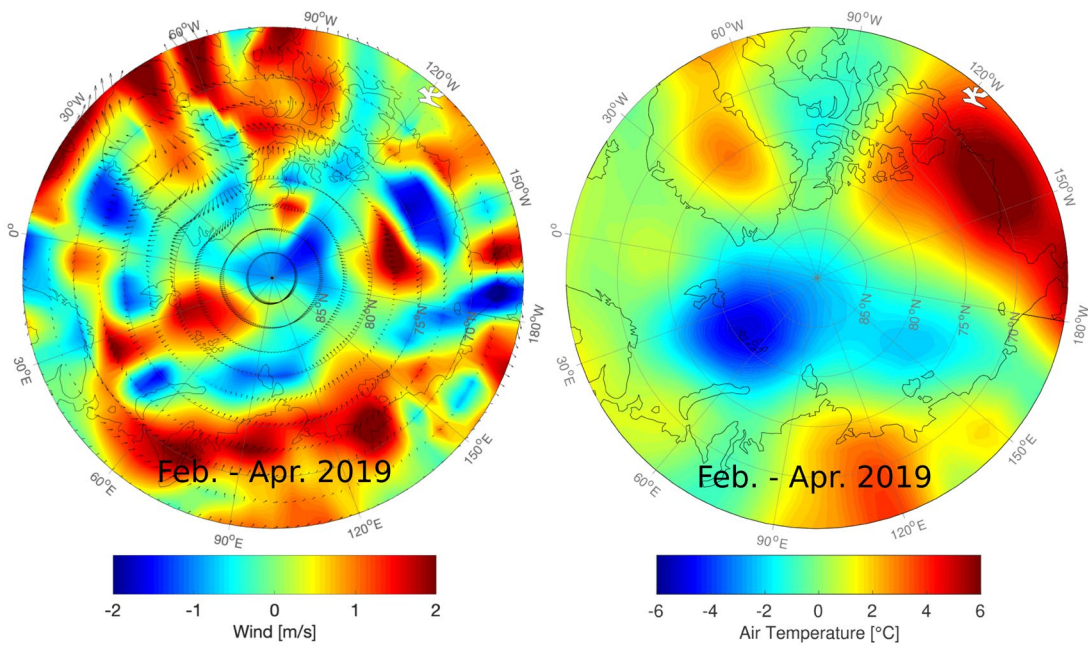

10 **Figure S2:** left) February – April 2019 wind velocity anomalies at 10 m height and right) February - April 2019 1000 hPa air temperature anomalies in comparison to the 2011 - 2018 (CryoSat-2 period) climatology (data source: [www.esrl.noaa.gov/psd/products](http://www.esrl.noaa.gov/psd/products)).

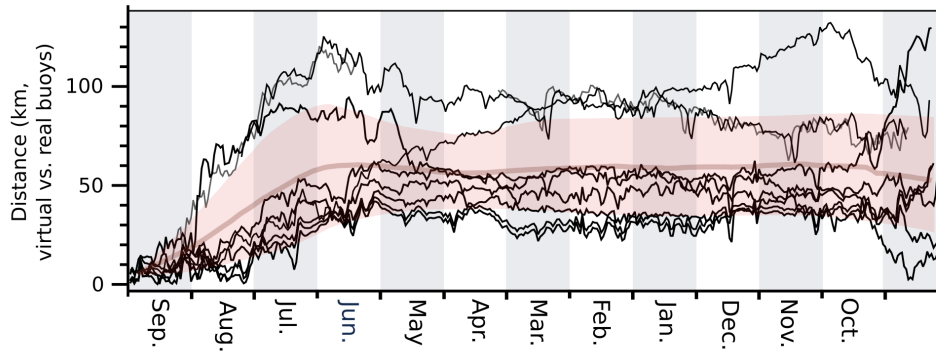

15

**Figure S3:** Results from backward tracking of buoy locations: Distance between 10 buoys (source: seaiceportal.de) deployed on sea ice in the Arctic Ocean between 2015 and 2018 and their reconstructed trajectories (virtual buoys).

20

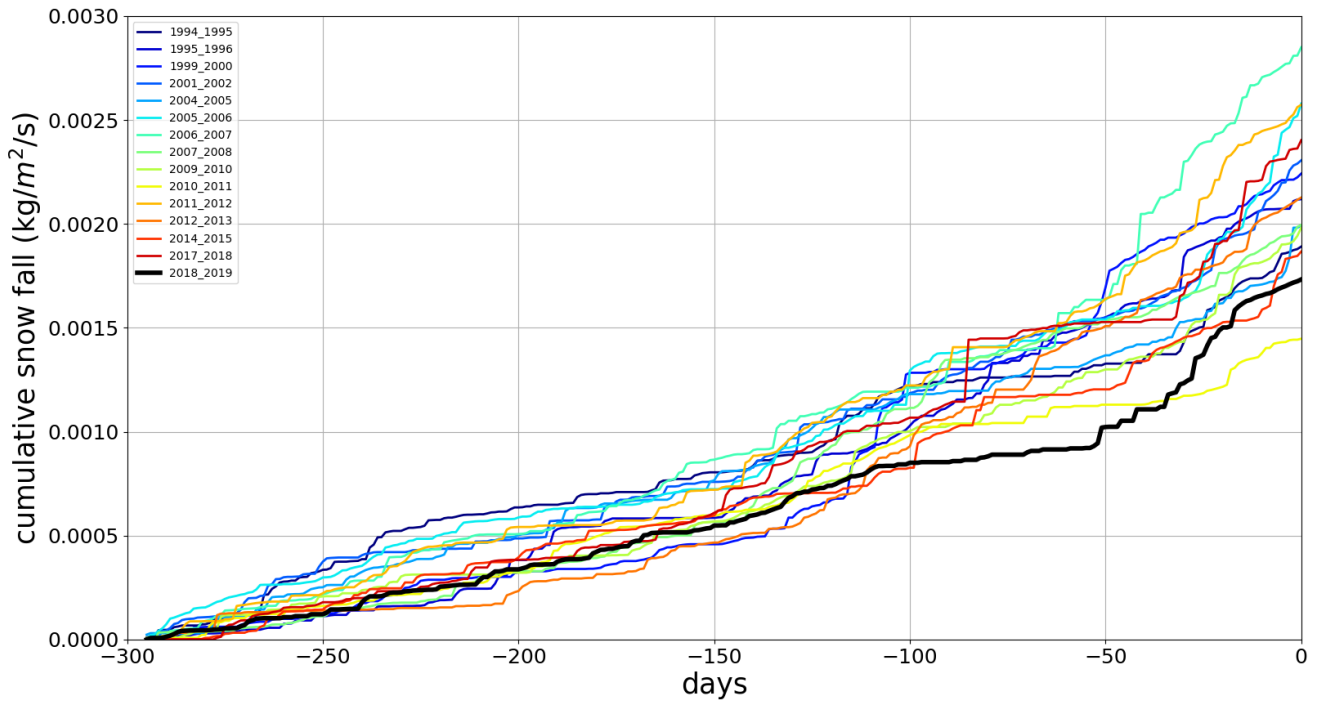

**Figure S4:** Snow accumulation along trajectories between 1994 – 2019 (FYI only, compare Fig. 7). Precipitation rates are obtained from NCEP reanalysis data.

25
